# Supplementary material for: One-Year Mortality Prediction in Elderly Patients With Suspected Pneumonia: The Usefulness of a Holistic Approach
Source: Research Square preprint supplement (doi:10.21203/rs.3.rs-558655/v1), 2021-07-19
Supplement: Supplementary file 1 [file 4dd2fe9ea7395f9894cf3139.docx]

**Title page**

One-year mortality prediction in elderly patients with suspected pneumonia: the usefulness of a holistic approach

Alberto Nascè§ MD1, Astrid Malézieux-Picard§ MD1, Landry Hakiza MD1, Thomas Fassier MD, PhD1, Dina Zekry MD, PhD1, Nicolas Garin MD2,3, Jérôme Stirnemann MD PhD3, Virginie Prendki* MD1,4, Xavier Roux* MD1,5

1. Division of Internal Medicine for the Aged, Department of Rehabilitation and Geriatrics, Geneva University Hospitals, Chemin du Pont-Bochet 3, 1226 Thônex, Switzerland
2. Department of General Internal Medicine, Riviera Chablais Hospitals, Route du Vieux-Séquoïa 20, 1847 Rennaz, Switzerland
3. Division of General Internal Medicine, Department of Internal Medicine, Rehabilitation and Geriatrics, Geneva University Hospitals, Rue Gabrielle-Perret-Gentil 4, 1205 Genève, Switzerland
4. Division of Infectious Diseases, University Hospitals of Geneva, Switzerland
5. Division of Intensive Care Unit, University Hospitals of Geneva, Switzerland

§ Alberto Nascè and Astrid Malézieux-Picard contributed equally to this work.

* Virginie Prendki and Xavier Roux contributed equally to this work. On behalf of PneumOldCT group

**Corresponding author:**

Xavier Roux ([xavier.roux@hcuge.ch](mailto:xavier.roux@hcuge.ch)); +41 79 55 30741; Division of Internal Medicine for the Aged, Department of Rehabilitation and Geriatrics, Geneva University Hospitals, Chemin du Pont-Bochet 3, 1226 Thônex, Switzerland).

**Appendix**

*SCORES DESCRIPTION*

Cumulative Illness Rating Scale-Geriatric (CIRS-G, range: 0-56) measures the cumulative comorbidity burden in 14 organ systems each rated from 0 (no impairment) to 5 (extremely severe life threatening impairment). This scale, designed for the elderly, evaluates the severity of illnesses as a function of the effect of disability.

Mini Nutritional Assessment (MNA Long Form, range: 0-30; MNA Short Form, range: 0-14) is able to identify geriatric patients aged 65 and above who are malnourished or at risk of malnutrition. It is composed of simple measurements and brief questions that can be completed in about 10 minutes. The lower the score, the more severe the patient’s malnutrition.

Charlson Comorbidity Index (CCI, range: 0-37) originally developed to predict 1-year mortality amongst comorbid patients, it features 19 conditions with assigned weights from 1 to 6, and a total score is obtained by adding up the weights of all present comorbidity illnesses. The diseases are selected on the basis of the degree of their association with mortality.

Functional Independence Measure (FIM, range: 18-126) is an 18 items tool that explores an individual’s physical, psychological and social function. It is used to assess the level of disability of a patient as well as the changes in his or her condition following rehabilitation or medical intervention. The higher the score, the greater the patient’s functional abilities.

Mini Mental State Examination (MMSE, range: 0-30) is a questionnaire that is used extensively in clinical and research settings to measure cognitive impairment. Any score of 24 or more (out of 30) indicates normal cognition. Below this, scores can indicate severe (≤ 9 points), moderate (10–18 points) or mild (19–23 points) cognitive impairment.

Pneumonia Severity Index (PSI, range: 51-395) is a clinical prediction scale that physicians can use to calculate the likelihood of morbidity and mortality in patients with community-acquired pneumonia. This score is also frequently used to predict the need for hospitalization in people with pneumonia.

Confusion, Urea, Respiratory Rate, Blood Pressure, 65-year old Score (CURB-65, range:0-5) determines the severity of a pneumopathy, and thus decides whether the patient should be referred to an outpatient or an inpatient clinic.

Sepsis-related Organ Failure Assessment (SOFA, range: 0-24; quick version: 0-3) is used to determine and follow a patient suffering from a single or multi-organ failure. It consists of 6 subscores investigating different biological systems: respiratory, neurologic, cardiovascular, hepatic, renal and coagulation.
